# Supplementary material for: Tuning coordination modes of pyridine/thioether Schiff base (NNS) ligands to mononuclear manganese carbonyls
Source: Royal Society of Chemistry journal article supplement (doi:10.1039/c4dt00600c), 2014-01-01
Supplement: c4dt00600c1.pdf [file c4dt00600c1.pdf]

*Supporting Information for:*

**Tuning Coordination Modes of Pyridine/Thioether (NNS) Schiff Base Ligands to Mononuclear Manganese Carbonyls**

Simone E. A. Lumsden, Gummadi Durgaprasad, Keren A. Thomas Muthiah

and Michael J. Rose\*

*Department of Chemistry, University of Texas at Austin*

| <b>Contents</b>                                                                                               | <b>Page</b> |
|---------------------------------------------------------------------------------------------------------------|-------------|
| <b>Figure S1.</b> Variable temperature $^1\text{H}$ NMR of <b>1</b> <sub>Co</sub> in $\text{CD}_2\text{Cl}_2$ | 2           |
| <b>Figure S3.</b> Disorder model for <b>5</b> <sub>Co-b</sub>                                                 | 3           |

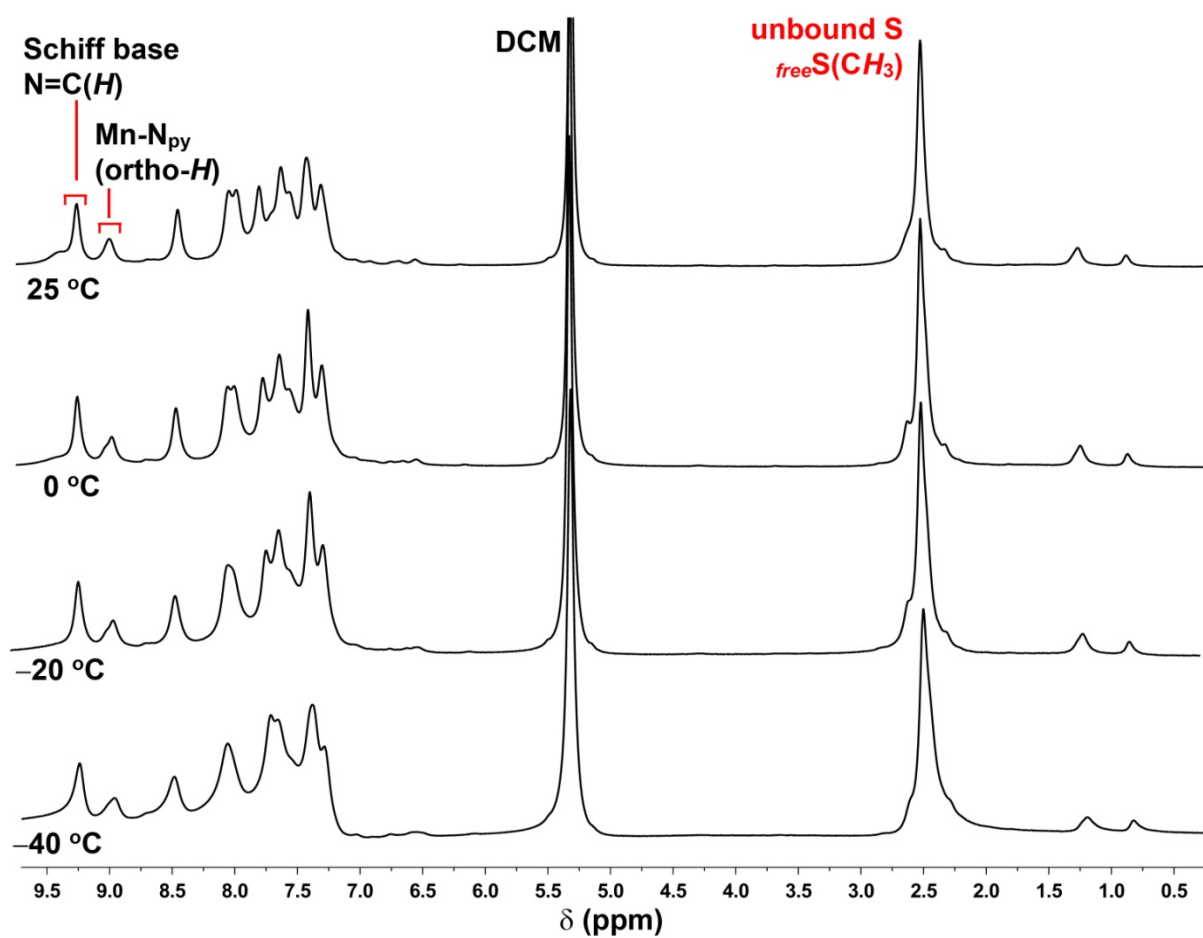

**Figure S1.** Variable temperature  $^1\text{H}$  NMR (500 MHz) of  $[(\text{NNS})\text{Mn}(\text{CO})_3\text{Br}]$  ( $1_{\text{co}}$ ) in  $\text{CD}_2\text{Cl}_2$ .

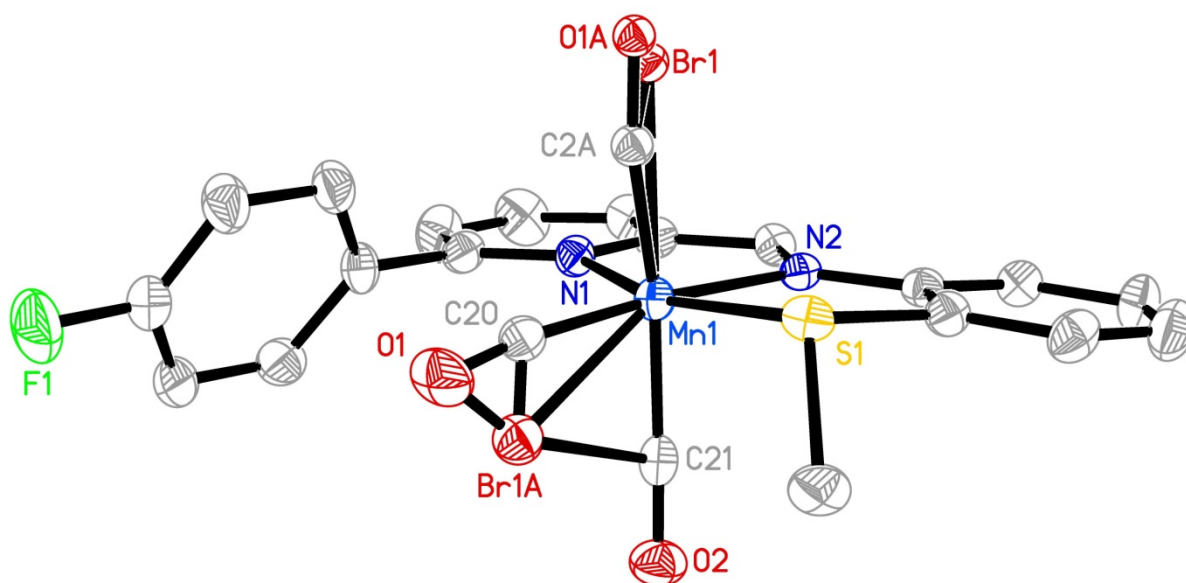

**Figure S2.** Disorder model found for  $[(_{\text{FPh}}\text{NNS})\text{Mn}(\text{CO})_2\text{Br}]$  (**5<sub>co-b</sub>**). In the structure solution, 4% of the complex in the crystal is a five-coordinate *monocarbonyl* Mn<sup>I</sup> complex formulated as  $[(_{\text{FPh}}\text{NNS})\text{Mn}(\text{CO})(\text{Br})]$  with a geometry intermediate between trigonal bipyramidal and square planar. Thermal ellipsoids are shown at 50% probability, and H atoms are omitted for clarity.
